# Supplementary material
Source: PubMed Central journal article supplement (PMC6600348)

**Table S1.** Genes more than 100-fold upregulated at late-exponential phase, relative to early-exponential phase <sup>ψ</sup>.

| ID       | Gene symbol | Description                                                               | Fold-change (late/early) | p-value  |
|----------|-------------|---------------------------------------------------------------------------|--------------------------|----------|
| SMU.574c | <i>IrgB</i> | hypothetical protein                                                      | 980                      | < 1e-07  |
| SMU.575c | <i>IrgA</i> | hypothetical protein                                                      | 914                      | < 1e-07  |
| SMU.1424 | <i>pdhD</i> | putative dihydrolipoamide dehydrogenase                                   | 366                      | < 1e-07  |
| SMU.1423 | <i>pdhA</i> | putative pyruvate dehydrogenase, TPP-dependent E1 component alpha-subunit | 361                      | 1.00E-07 |
| SMU.1422 | <i>pdhB</i> | putative pyruvate dehydrogenase E1 component beta subunit)                | 336                      | 2.00E-07 |
| SMU.311  |             | PTS system, sorbitol (glucitol) phosphotransferase enzyme IIC2            | 315                      | < 1e-07  |
| SMU.1421 | <i>pdhC</i> | branched-chain alpha-keto acid dehydrogenase subunit E2                   | 284                      | 3.00E-07 |
| SMU.308  |             | sorbitol-6-phosphate 2-dehydrogenase                                      | 282                      | < 1e-07  |
| SMU.310  |             | sorbitol operon activator                                                 | 274                      | 1.00E-07 |
| SMU.309  |             | regulator of sorbitol operon                                              | 271                      | 4.00E-07 |
| SMU.312  |             | PTS system, sorbitol phosphotransferase enzyme IIBC                       | 257                      | < 1e-07  |
| SMU.313  |             | putative PTS system, sorbitol-specific enzyme IIA                         | 239                      | 1.00E-07 |
| SMU.609  |             | putative 40K cell wall protein precursor                                  | 227                      | 2.00E-07 |
| SMU.1598 | <i>celC</i> | cellobiose phosphotransferase system IIA component                        | 166                      | 1.00E-05 |
| SMU.1599 | <i>celR</i> | putative transcriptional regulator, possible antiterminator               | 160                      | 4.60E-06 |
| SMU.1600 | <i>celB</i> | cellobiose phosphotransferase system IIB component                        | 146                      | 4.00E-07 |
| SMU.114  |             | putative PTS system, fructose-specific IIBC component                     | 135                      | 3.80E-06 |
| SMU.1495 | <i>lacB</i> | galactose-6-phosphate isomerase subunit LacB                              | 125                      | 5.50E-06 |
| SMU.314  |             | hypothetical protein                                                      | 120                      | 6.00E-07 |
| SMU.1596 | <i>celD</i> | cellobiose phosphotransferase system IIC component                        | 116                      | 4.00E-07 |
| SMU.1492 | <i>lacF</i> | PTS system, lactose-specific enzyme IIA EIIA-LAC)                         | 105                      | 8.20E-04 |

<sup>ψ</sup> This table was reconstituted from RNA expression profiles (GEO Accession # GSE39470) comparing the early- and late-exponential growth phases of wild type UA159 strain in BHI medium [1], and presented the genes more than 100-fold upregulated at late-exponential phase, relative to early-exponential phase.

**Fig. S1**

**(a)**

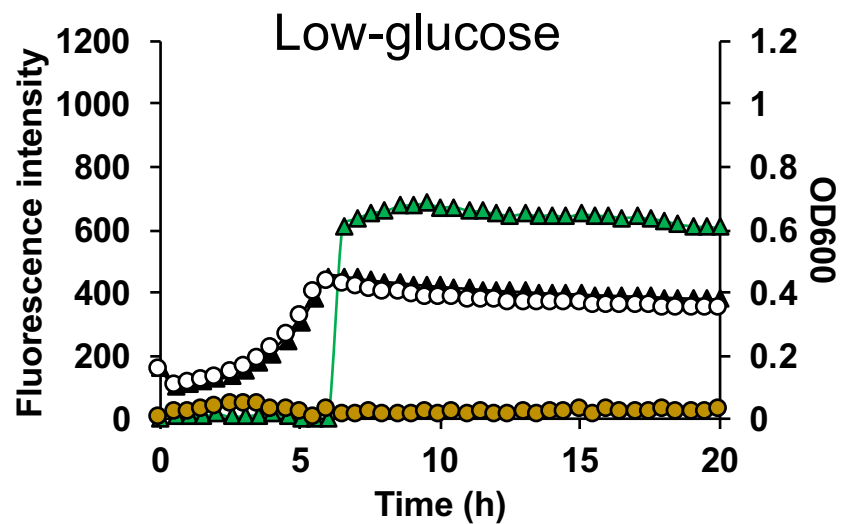

▲ UA159/Plrg-gfp\_F    ● UA159/Pcld-gfp\_F  
▲ UA159/Plrg-gfp\_OD    ○ UA159/Pcld-gfp\_OD

**(b)**

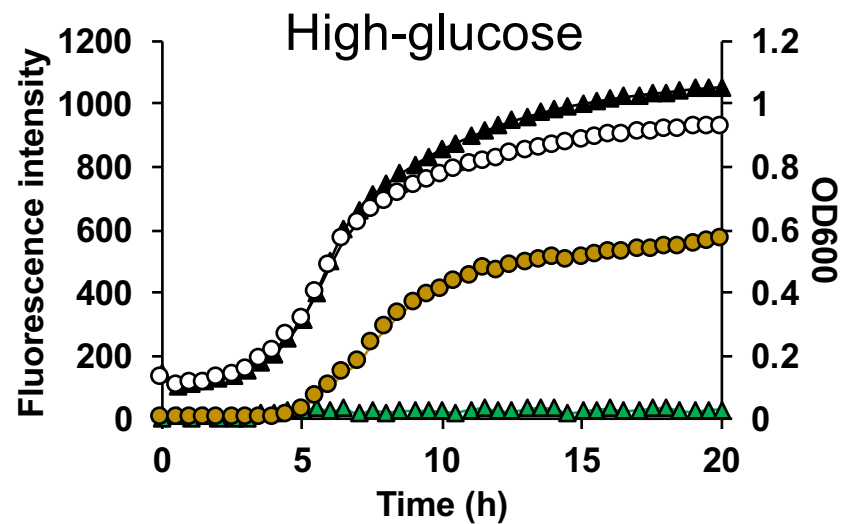

▲ UA159/Plrg-gfp\_F    ● UA159/Pcld-gfp\_F  
▲ UA159/Plrg-gfp\_OD    ○ UA159/Pcld-gfp\_OD

# Fig. S2

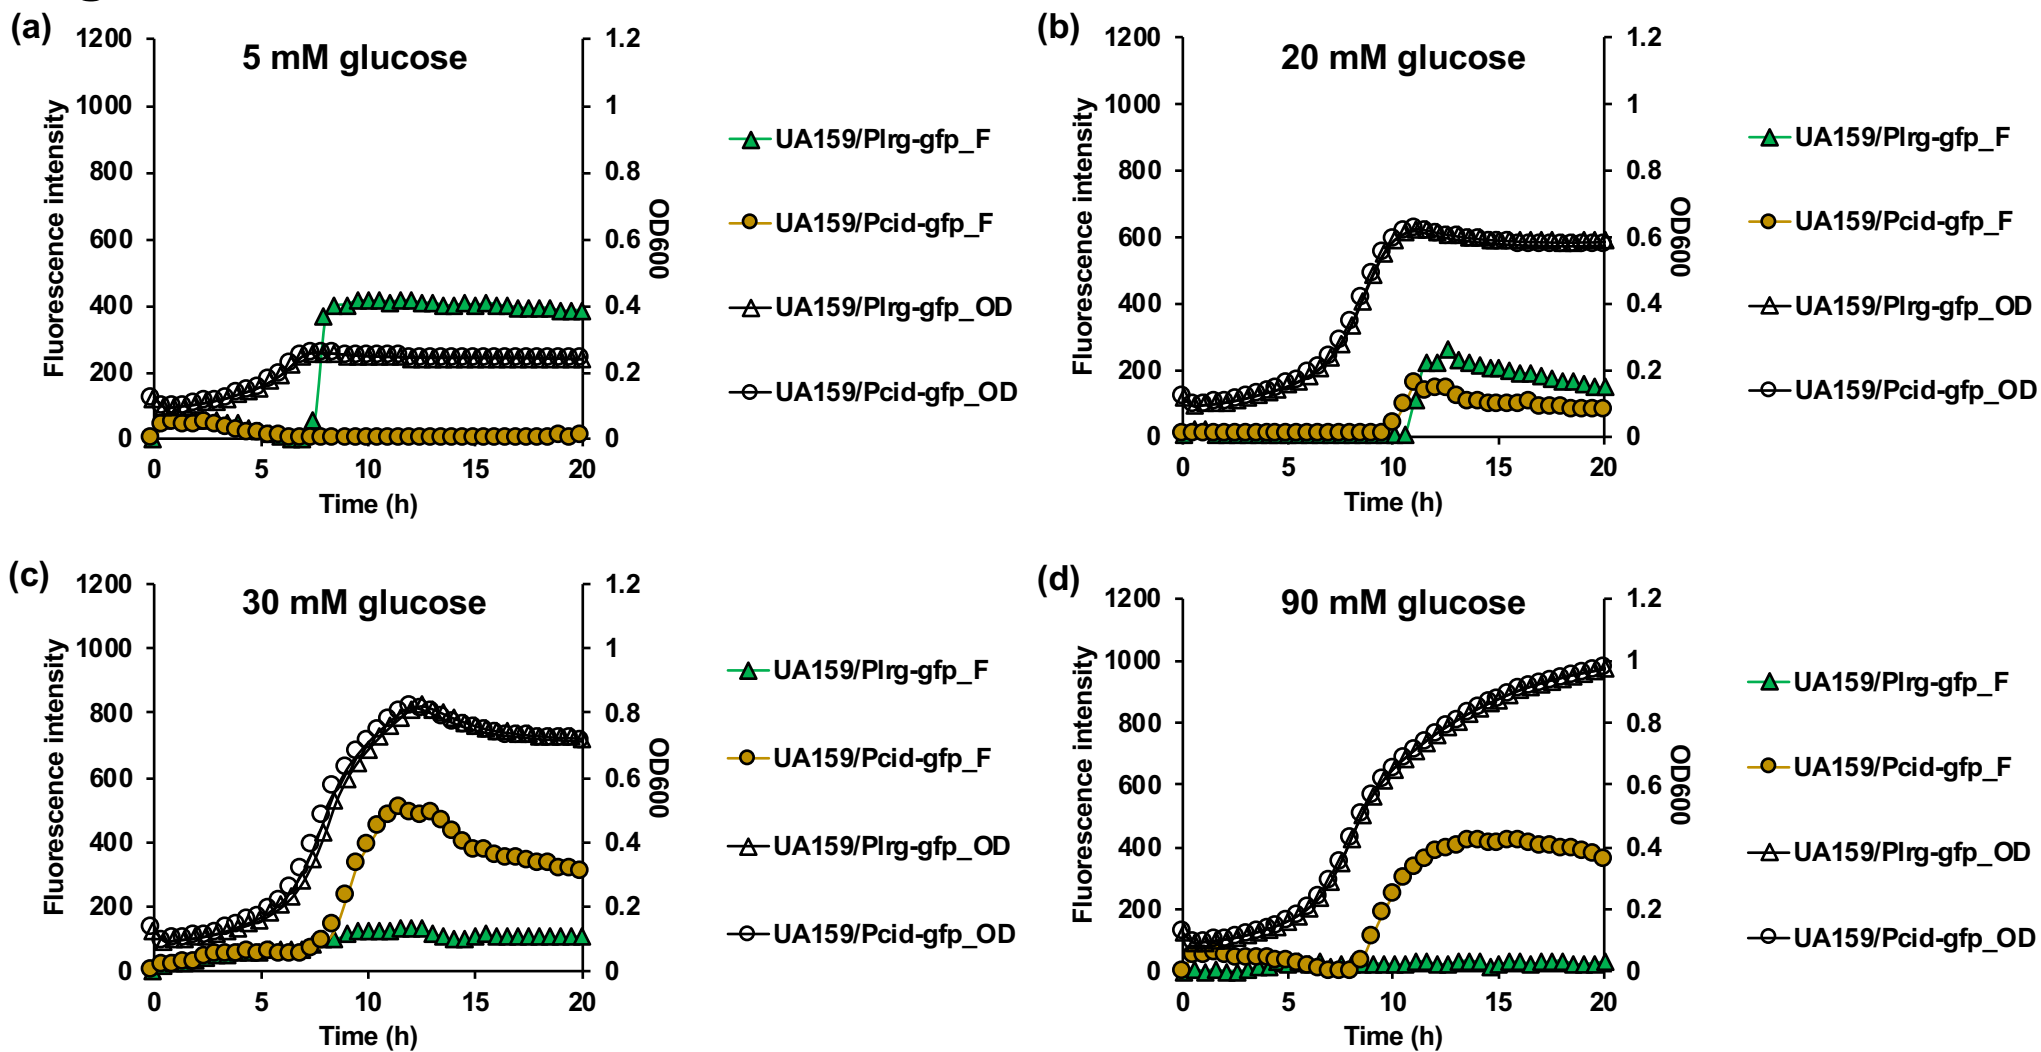

**Fig. S3**

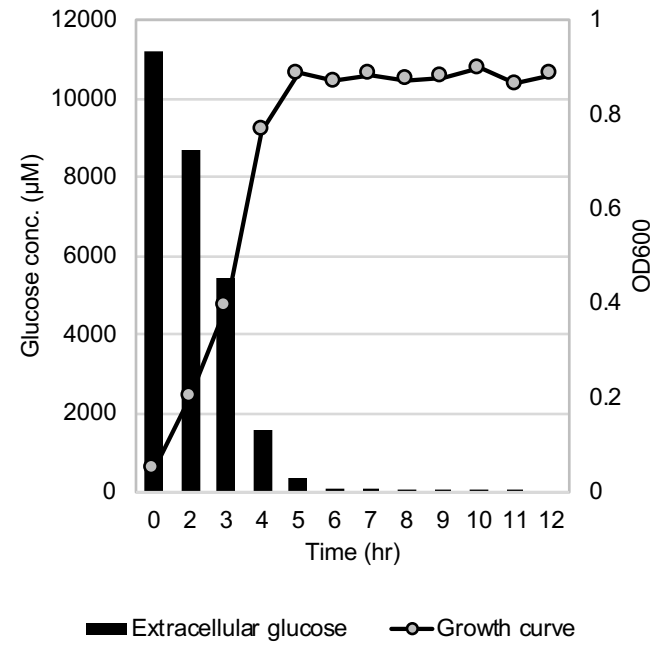

Supplement: mic-165-113-s001.pdf [file mic-165-113-s001.pdf]
